# Supplementary material
Source: PubMed Central journal article supplement (PMC3475350)
Supplement: mmc1.pdf [file mmc1.pdf]

# Supporting Material for

## Differential Dynamic Microscopy: a High-Throughput Method for Characterizing the Motility of Microorganisms

Vincent A. Martinez<sup>1</sup>, Rut Besseling<sup>1</sup>, Ottavio A. Croze<sup>2</sup>, Julien Tailleur<sup>3</sup>, Mathias Reufer<sup>1</sup>, Jana Schwarz-Linek<sup>1</sup>, Laurence G. Wilson<sup>1,4</sup>, Martin A. Bees<sup>2</sup>, Wilson C. K. Poon<sup>1</sup>

<sup>1</sup> SUPA, School of Physics and Astronomy, University of Edinburgh, Edinburgh, UK

<sup>2</sup> School of Mathematics and Statistics, University of Glasgow, Glasgow, UK

<sup>3</sup> Université Paris Diderot, MSC Sorbonne Paris Cité UMR 7057 CNRS, Paris, France

<sup>4</sup> Rowland Institute at Harvard Cambridge, Massachusetts

### Supporting Figures

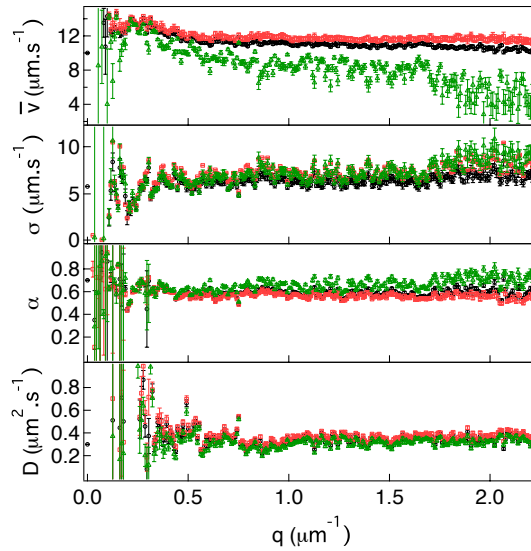

Figure S1: SW *E.coli*. Effect of using different forms of the speed distribution: Schulz (black circles), Log-normal (red squares)  $P_L(v) = \exp\left[-\left(\ln(v/v_g)\right)^2 / 2\sigma_g^2\right] / v\sigma_g\sqrt{2\pi}$ , or Gaussian (green triangles)  $P_G(v) = \exp\left[-(v - \bar{v})^2 / 2\sigma^2\right] / \sigma\sqrt{2\pi}$ , on the fitting parameters versus  $q$  using Eqs. 2, 4 & 6. See main text. Note that in the case of a Log-normal distribution, the arithmetic mean and standard deviation are  $\bar{v} = v_g \exp(\sigma_g^2/2)$  and  $\sigma = \bar{v} \sqrt{\exp(\sigma_g^2) - 1}$  respectively, where  $v_g$  and  $\exp(\sigma_g)$  are the geometric mean and geometric standard deviation.

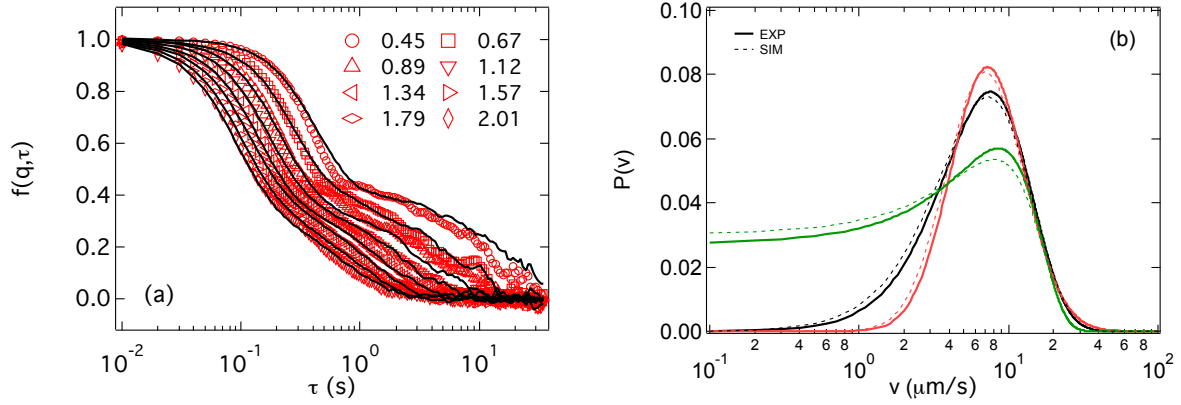

Figure S2: Comparison of SW *E.coli* experiments (Fig. 2-4) and straight swimmers simulations. Simulated data were generated using a depth of field  $\delta=40\mu\text{m}$ , a Schulz distribution for  $P(v)$ , and motility parameters obtained from experiments (Figure 4). (a) ISFs versus delay time at several  $q$  values in  $\mu\text{m}^{-1}$ . Symbols and lines are results for experiments and simulations respectively. (b) Results of the speed distribution  $P(v)$  obtained from fitting the  $g(q, \tau)$  functions assuming a Schulz (black), Log-normal (red) or Gaussian (green) distributions for experiments (lines) and simulations (dotted lines). The  $P(v)$  distributions were calculated from the mean speed  $\bar{v}$  and width  $\sigma$  averaged over the range  $0.6 < q < 1.7 \mu\text{m}^{-1}$  to avoid noisy values at higher  $q$  in the case of the Gaussian distribution (see Fig. S1).

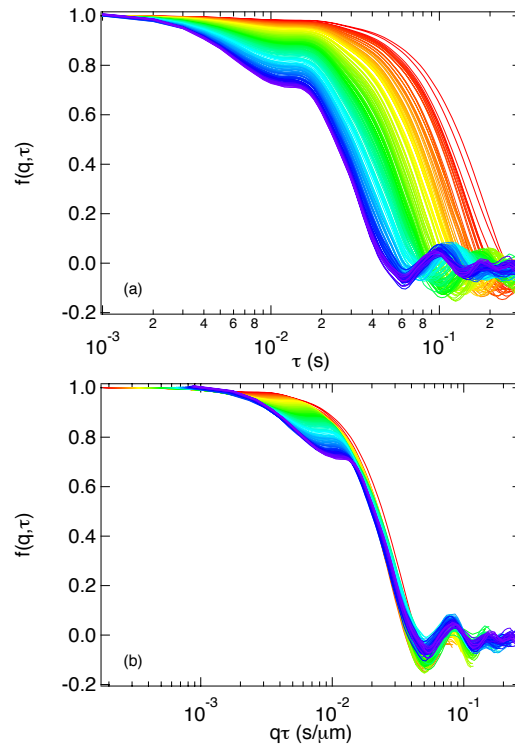

Figure S3: *C. reinhardtii*. The reconstructed ISFs,  $f(q, \tau)$ , plotted against (a)  $\tau$  and (b)  $q\tau$ . The  $q$  value increases, by step of  $\approx 0.004 \mu\text{m}^{-1}$ , from red to blue end of the spectrum colour in the range  $0.18 < q < 0.89 \mu\text{m}^{-1}$ . (a) The characteristic time of the fast process is independent of  $q$ , while its amplitude decreases with  $q$ . (b) The slow process scales with  $q\tau$  confirming the ballistic motion of this process.

### **Details for creation of smooth swimmer $\Delta cheY$ mutant strain:**

P1 phage transduction (1) was used to create a smooth swimming (AB1157  $\Delta cheY$ ) using the appropriate *E. coli* K-12 single knockout mutant from the KEIO collection (2). Kanamycin (final concentration 30 mg/l) was added to all growth media for AB1157  $\Delta cheY$ .

### **Supporting References:**

1. Miller, J.H. 1972. *Experiments in Molecular Genetics*. Cold Spring Harbor Laboratory Press.
2. Baba, T., T. Ara, M. Hasegawa, Y. Takai, Y. Okumura, M. Baba, K.A. Datsenko, M. Tomita, B.L. Wanner and H. Mori. 2006. *Construction of Escherichia coli K-12 in-frame, single-gene knockout mutants: the Keio collection*. *Syst. Biol.*, 2, 1-11.
